# Supplementary material
Source: Research Square preprint supplement (doi:10.21203/rs.3.rs-9265749/v1)
Supplement: Supplementary file 1 [file 451fe17c055babc57ff6f72b.docx]

**Supplementary Material**

**A predictive systems vaccinology framework enables rational optimization of MVA-based vaccines**

Vincent Deman1, 2, Philippe Castera2, [Juan García-Arriaza](https://pubmed.ncbi.nlm.nih.gov/?sort=date&term=Garc%C3%ADa-Arriaza+J&cauthor_id=41271759)3, 4, Mariano Esteban3, Marine Ciantar2, Laurent Naudin2, Anne-Sophie Beignon1, 5, *

*1 Université Paris-Saclay, Inserm, CEA, U1184, Immunological Diseases, Microbiology and Innovative Therapies (IDMIT), Fontenay-aux-Roses & Le Kremlin-Bicêtre, France*

*2 Dassault Systèmes BIOVIA, Vélizy-Villacoublay, France*

*3 Department of Molecular and Cellular Biology, Centro Nacional de Biotecnología (CNB), Consejo Superior de Investigaciones Científicas (CSIC), Madrid, Spain*

*4 Centro de Investigación Biomédica en Red de Enfermedades Infecciosas (CIBERINFEC), Madrid, Spain*

*5 CNRS, Campus Gérard Mégie, Délégation Paris Michel-Ange, Paris, France*

* Correspondence: [anne-sophie.beignon@cea.fr](mailto:anne-sophie.beignon@cea.fr)


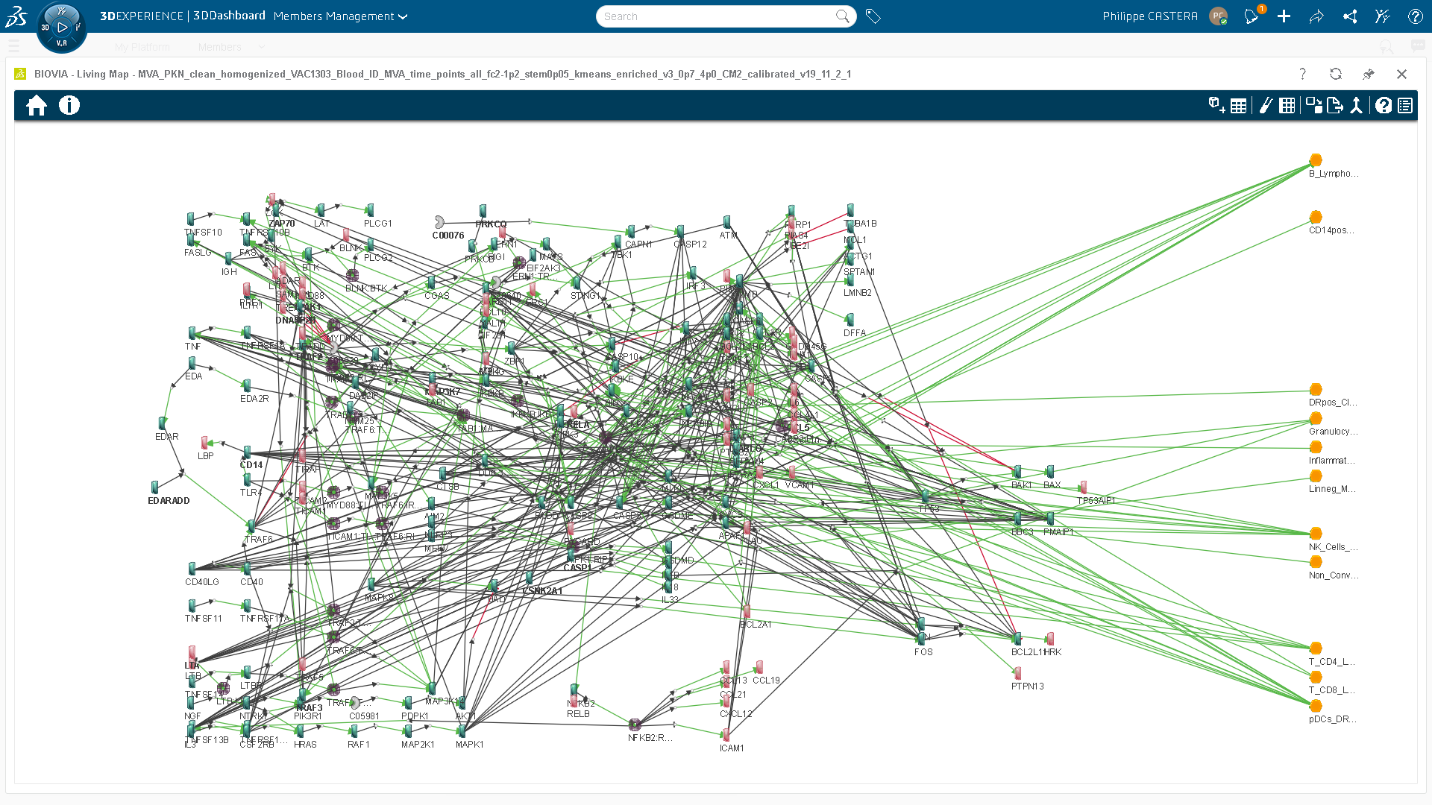
**Supplementary Figure S1: Calibrated Boolean network of the MVA-induced immune response.** The network backbone is composed of the following three pathways from the KEGG database: cytosolic DNA-sensing, apoptosis, and NF-κB signaling. The naïve network was calibrated with experimental preclinical data from 46, using ZhegAlCal 74. The calibrated network is visualized using Dassault Systèmes Living Map software and is also available for simulation, perturbation, and analysis on the CellCollective platform ([MVA 3 pathways](https://research.cellcollective.org#5b7e22aa-c290-447e-ac1d-b7784d2a5384)).

*Network update, 1; Experimental time point, 3 hours*

*
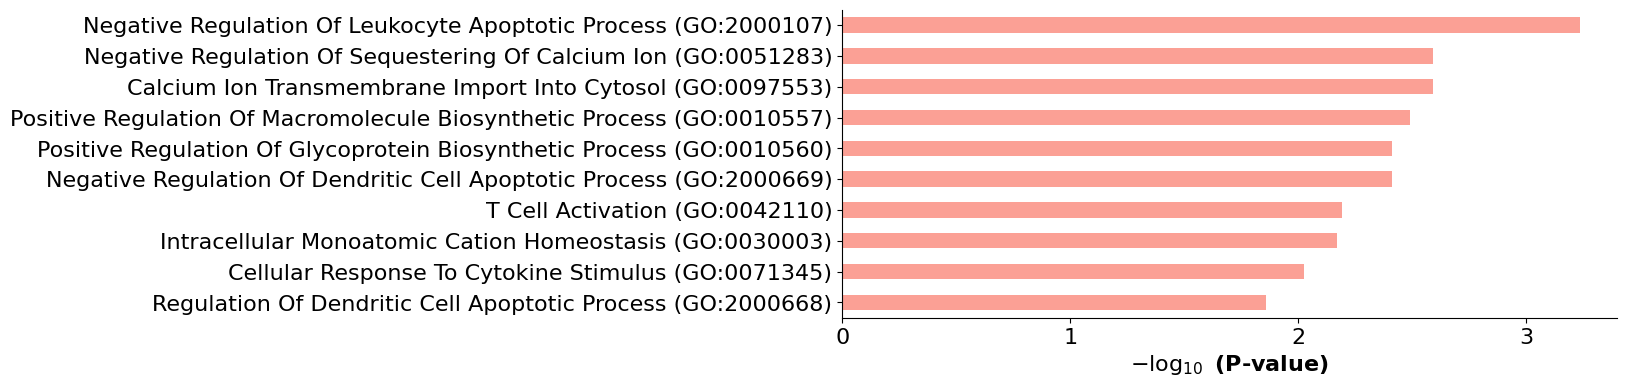
*

*Network update, 2; Experimental time point, 6 hours*

*
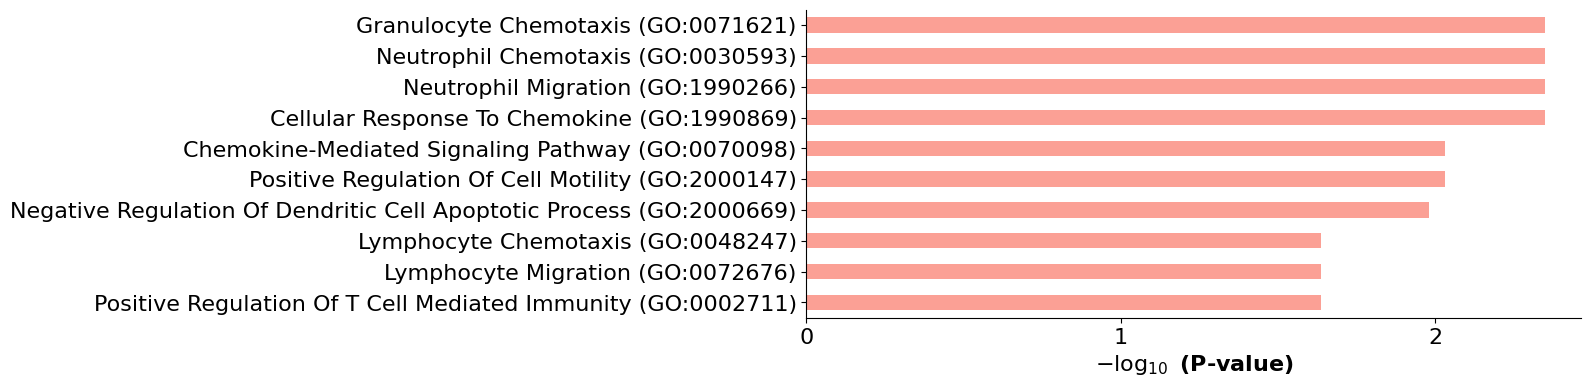
*

*Network update, 3; Experimental time point, 24 hours*

*
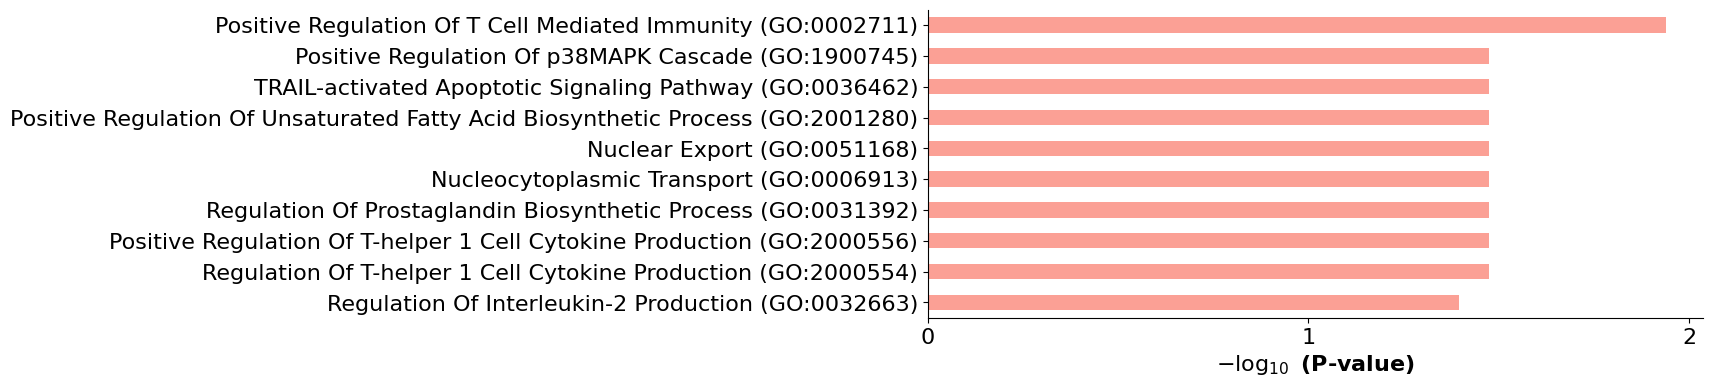
*

*Network update, 4 (intermediary simulation step that match non experimental time point)*

*
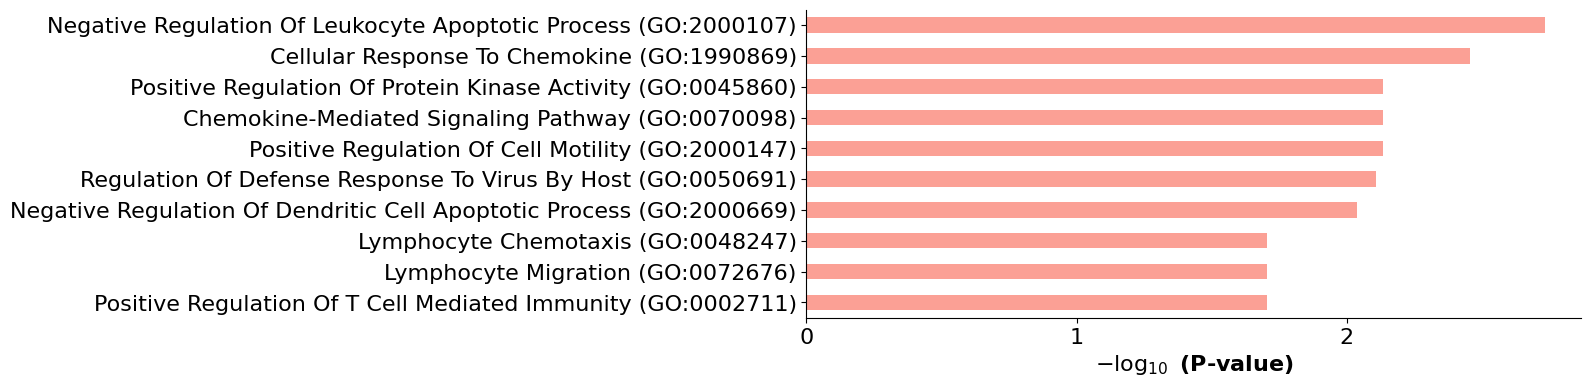
*

*Network update, 5; Experimental time point, 48 hours*

*
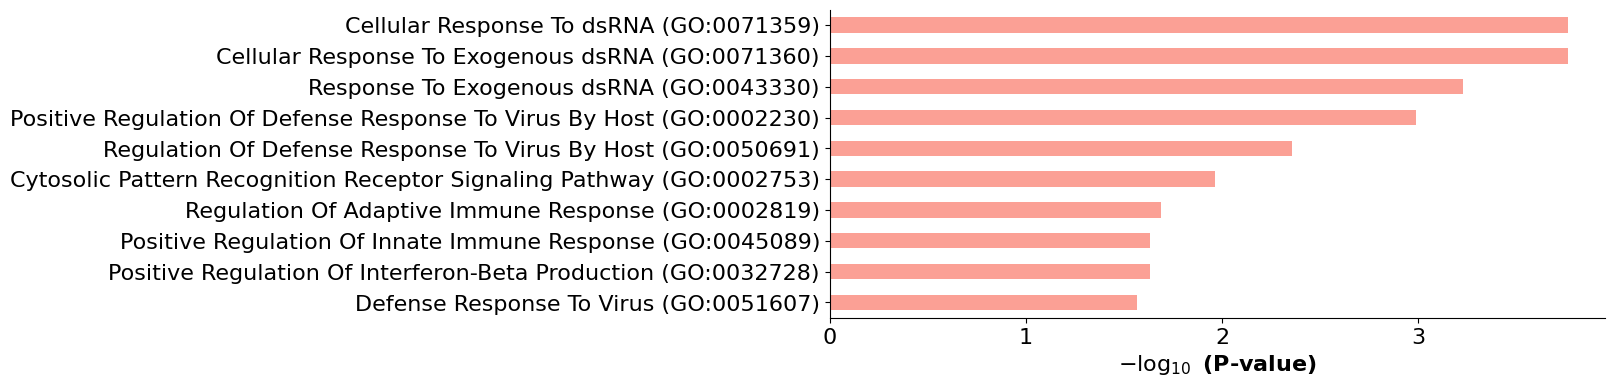
*

*Network update, 6 (intermediary simulation step that match non experimental time point)*

*
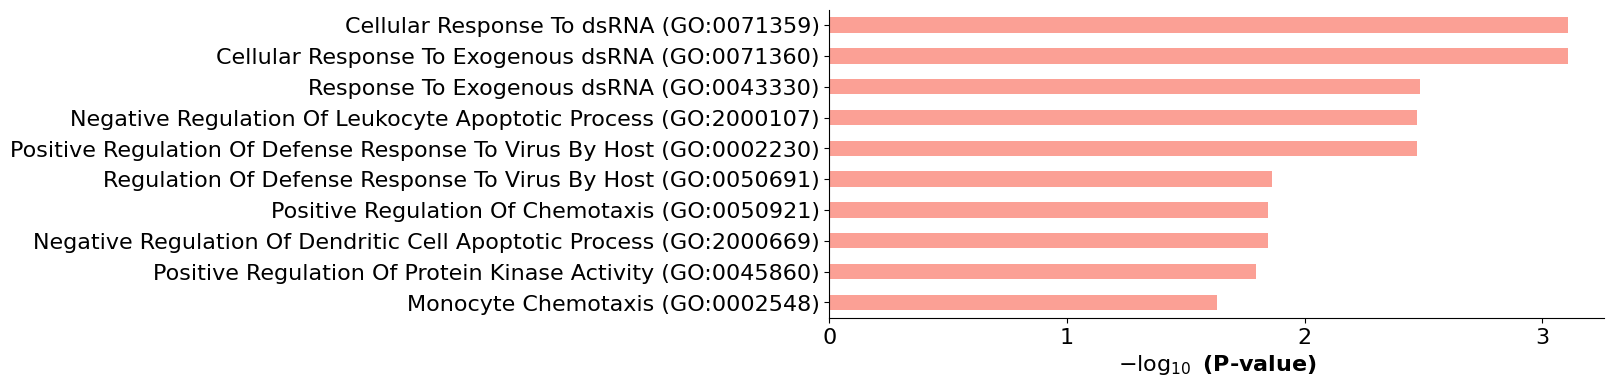
*

*Network update, 7; Experimental time point, 72 hours*

*
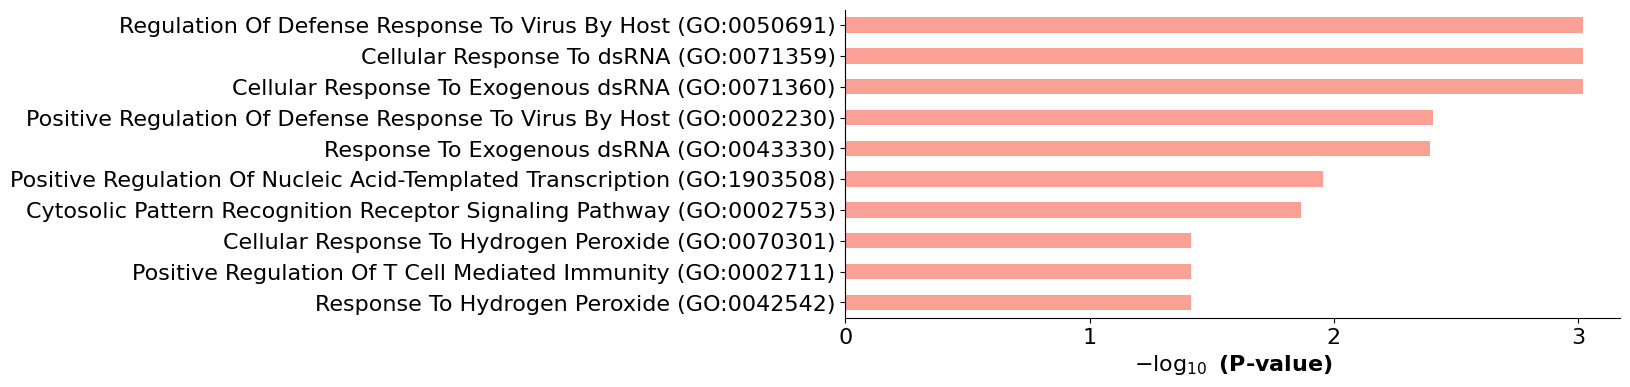
*

*Network update, 8 (intermediary simulation step that match non experimental time point)*

*
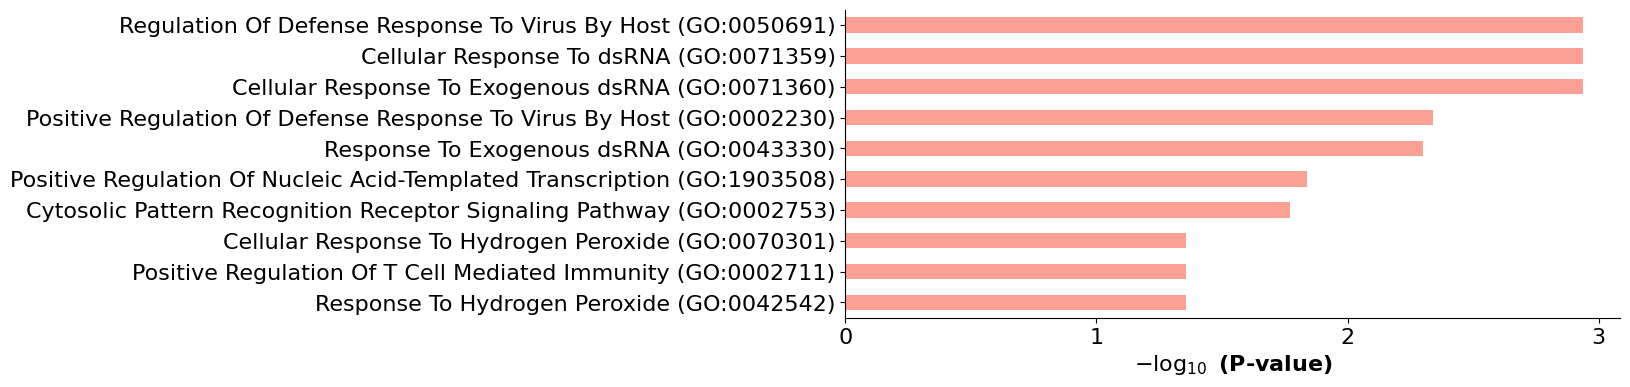
*

*Network update, 9; Experimental time point, 168 hours*

*
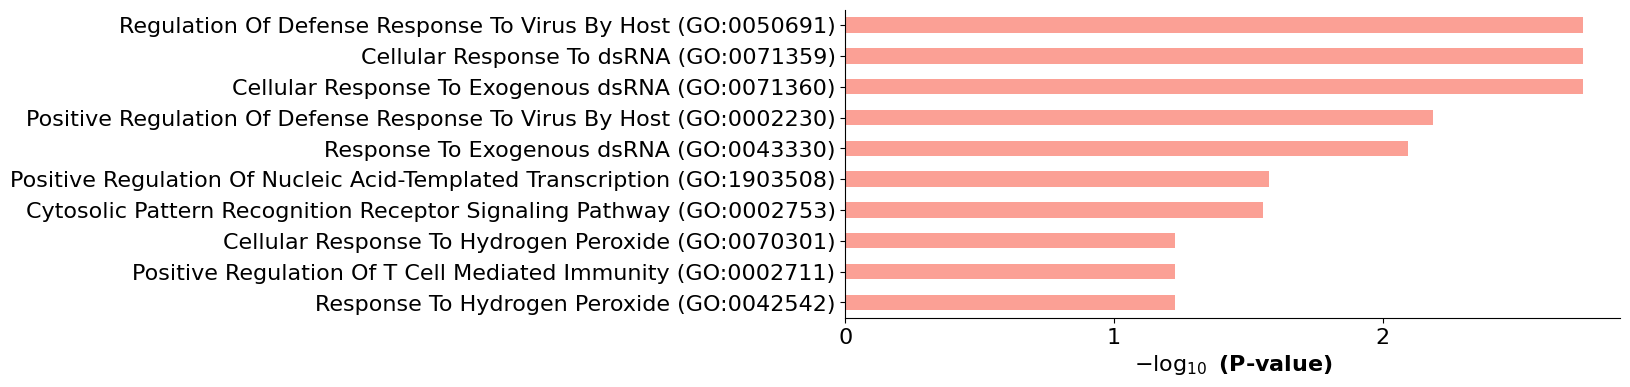
*

# **Supplementary Figure S2: Dynamic Gene Ontology (GO) enrichment analysis for the unperturbed MVA-induced innate immune response Boolean network trajectory.** The y-axis indicates the top 10 enriched biological process GO terms, while the x-axis displays the negative logarithm of the associated p-values (all < 0.05).

#
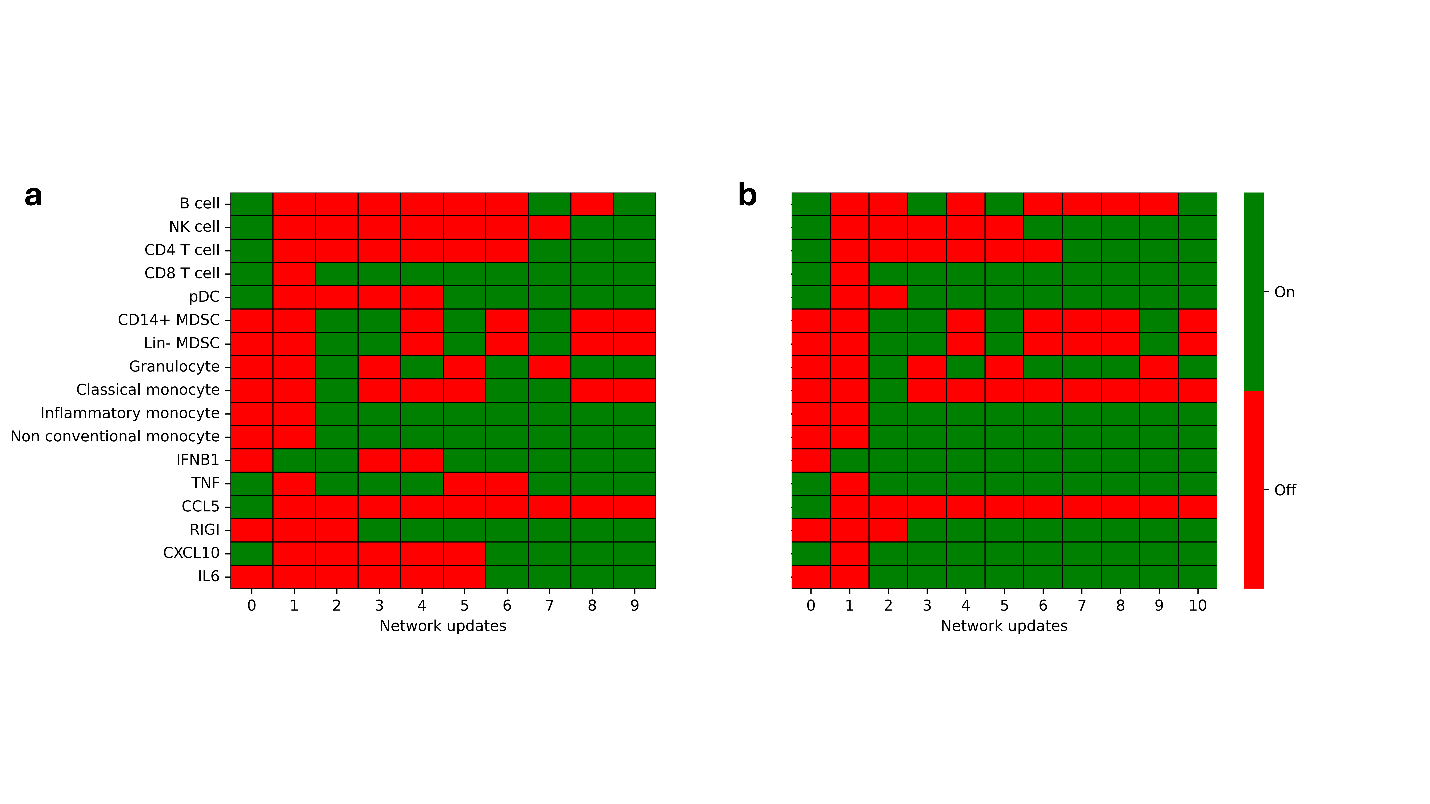
**Supplementary** **Figure S3: Binary cellular abundances and innate immune marker gene expressions in perturbed and unperturbed MVA-induced immune response Boolean network simulations. (a)** Parental MVA simulation. **(b)** Triple mutant MVA ΔC6L/ΔK7R/ΔA46R simulation.

*Network update, 1*

*
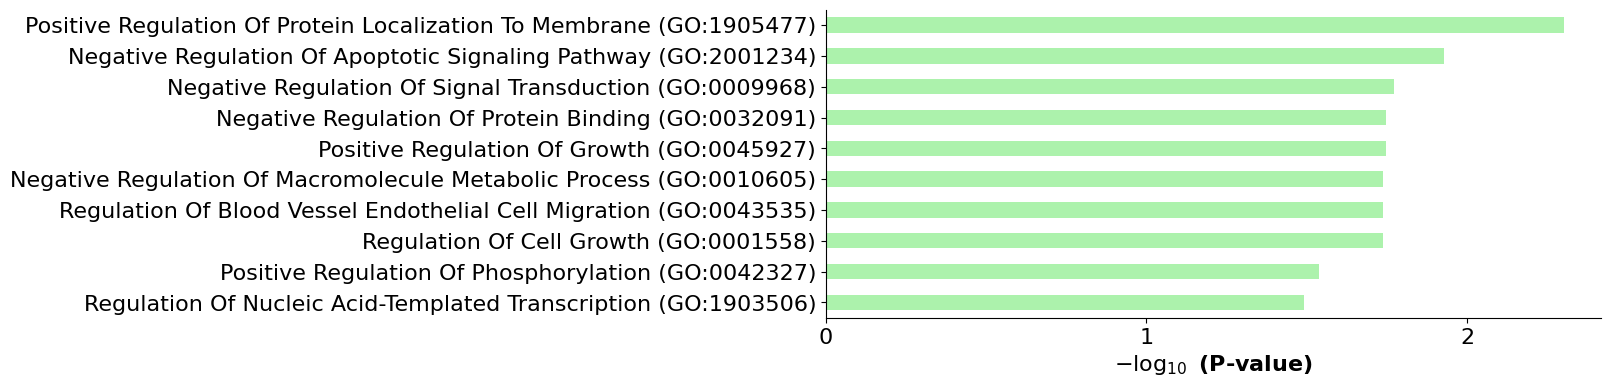
*

*Network update, 2*

*
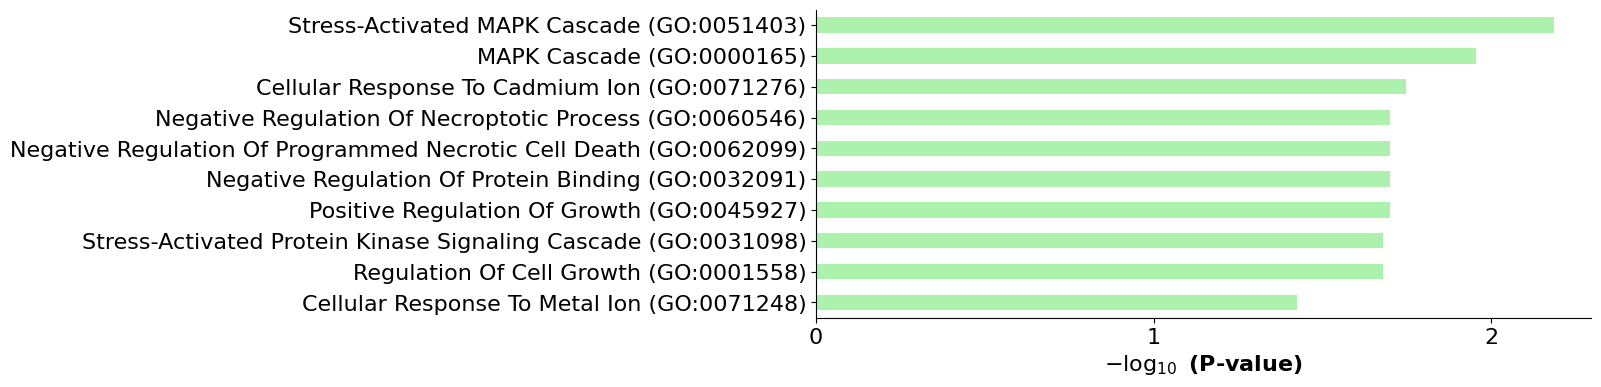
*

*Network update, 3*

*
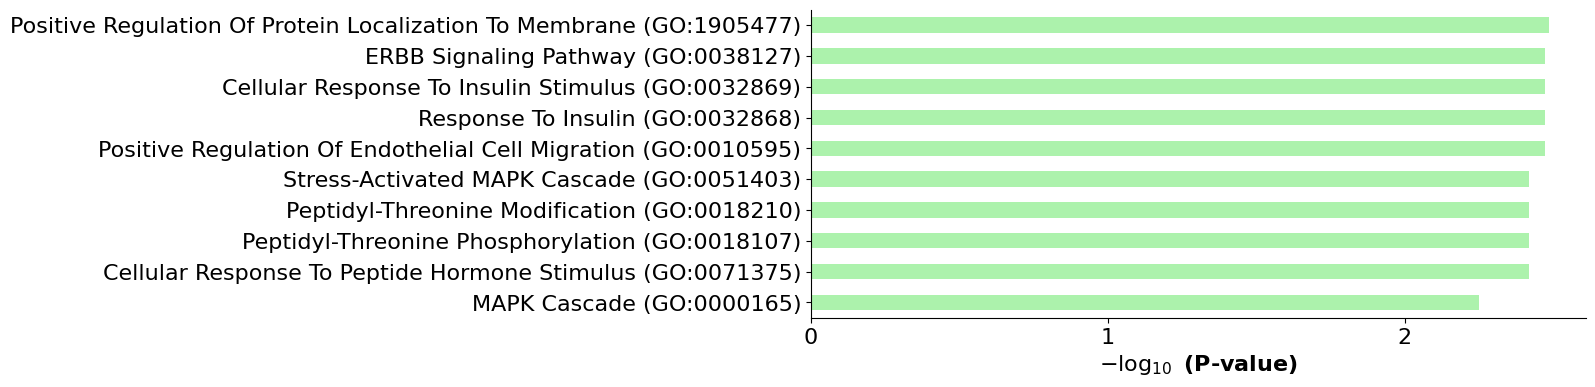
*

*Network update, 4*

*
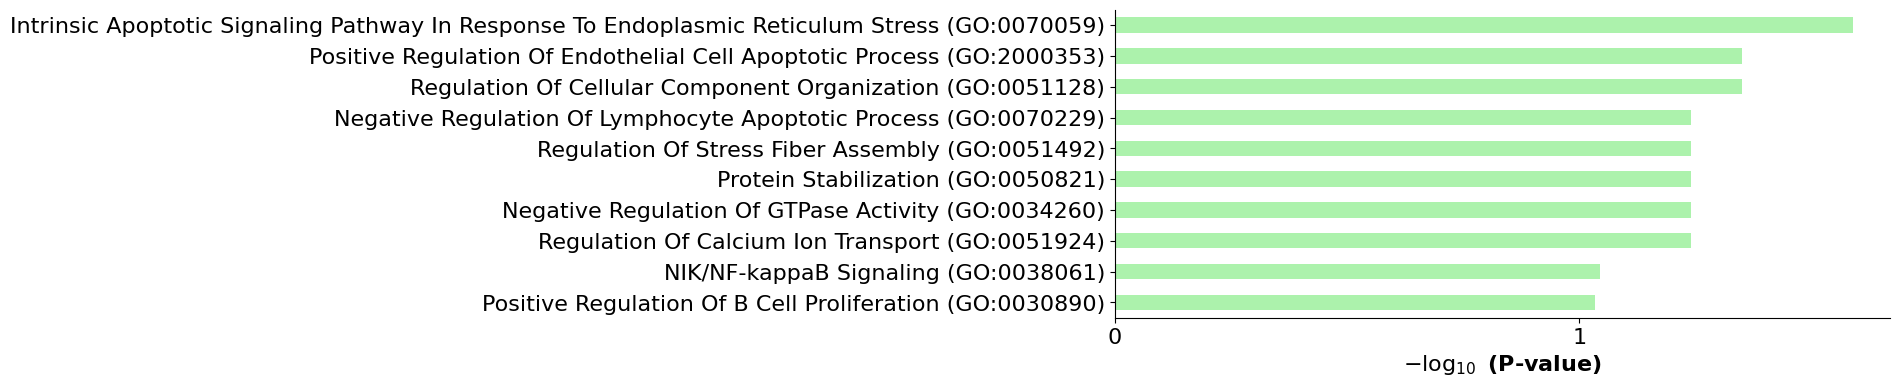
*

*Network update, 5*

*
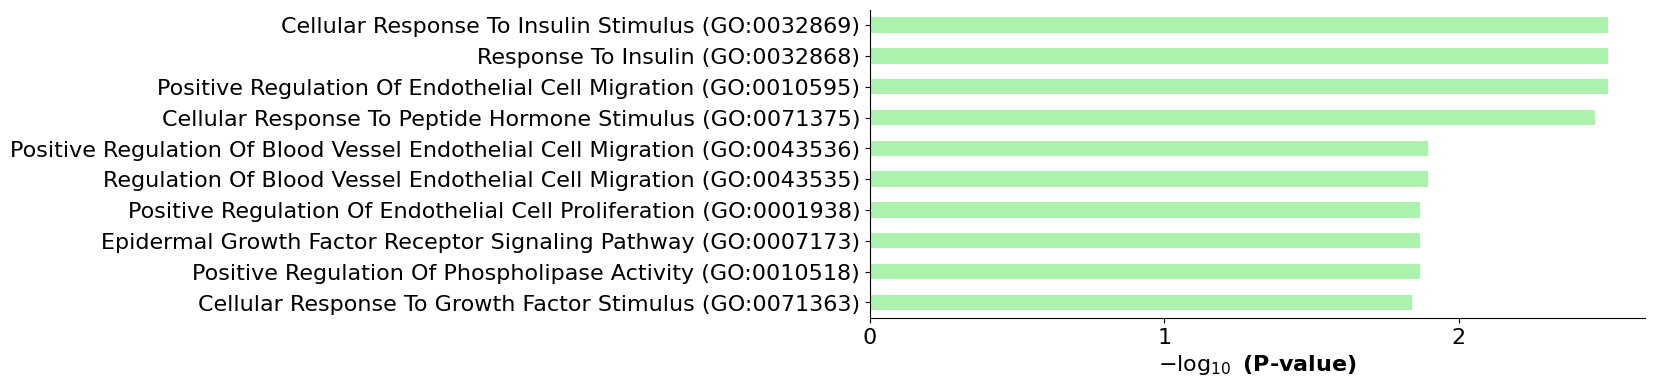
*

*Network update, 6*

*
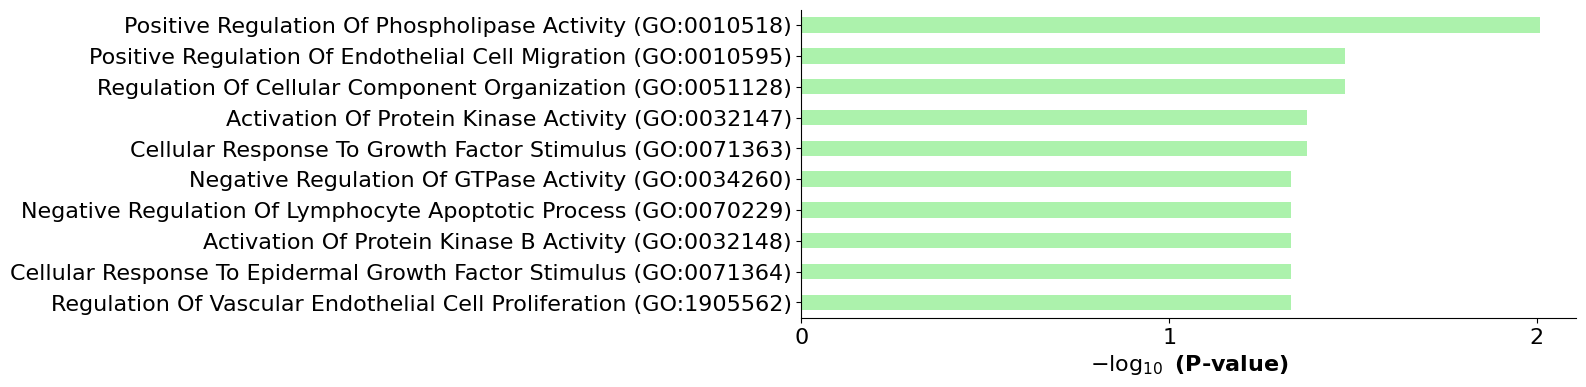
*

*Network update, 7*

*
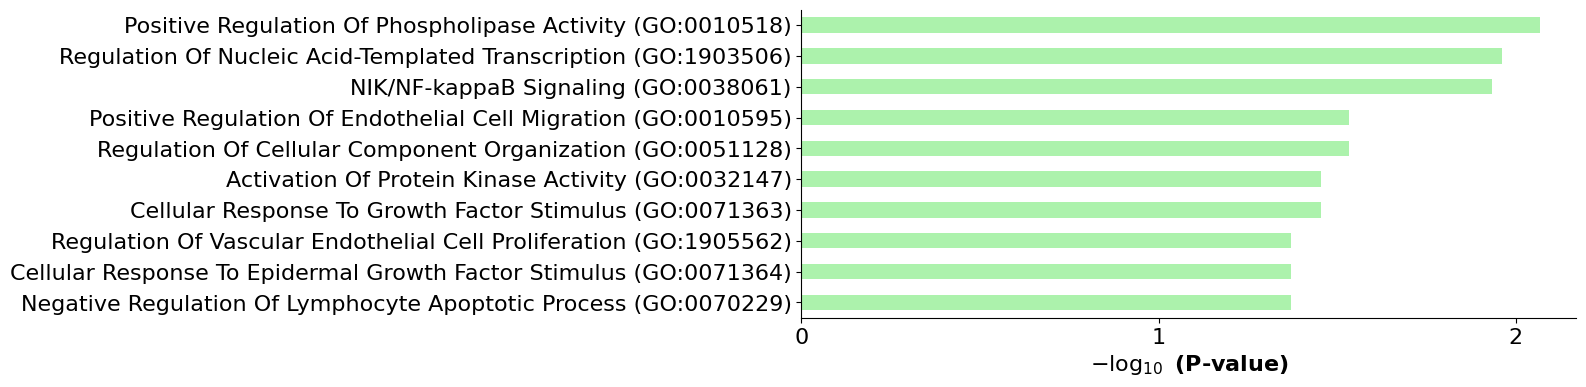
*

*Network update, 8*

*
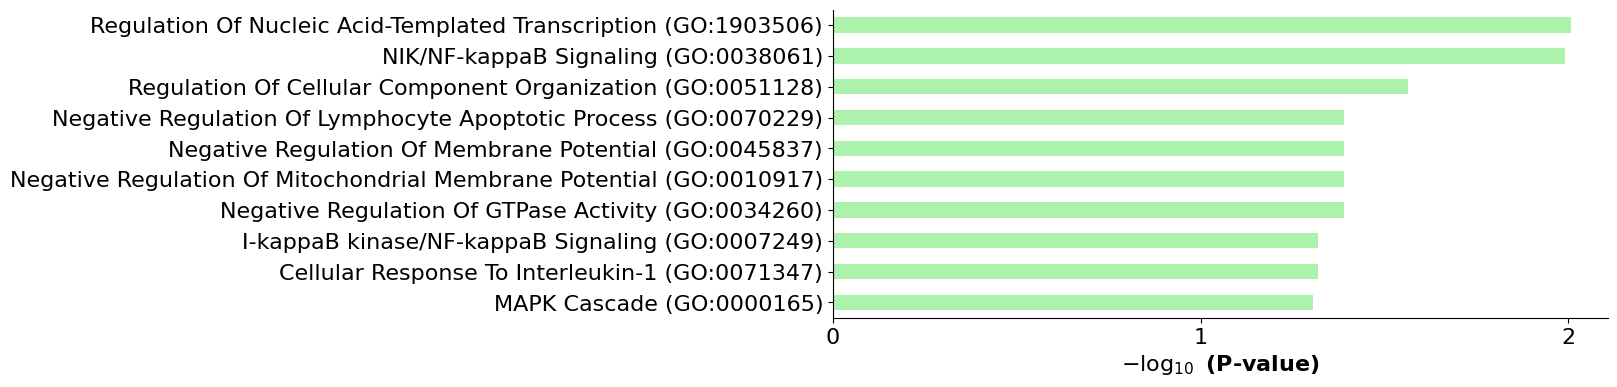
*

*Network update, 9*

*
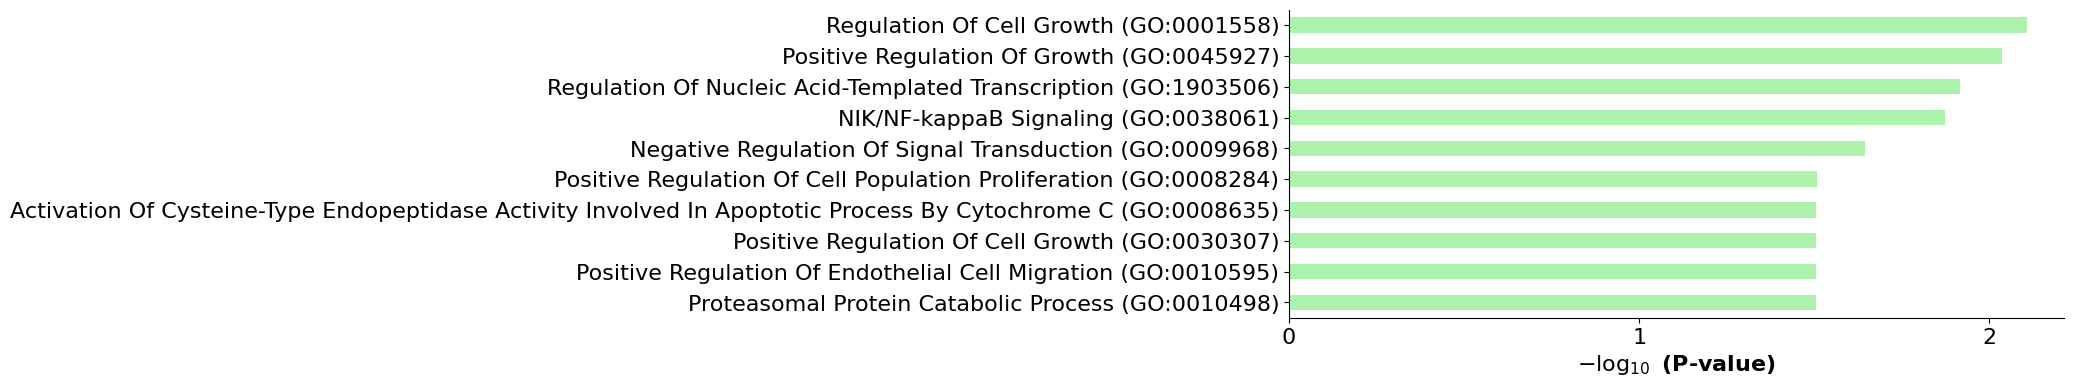
*

*Network update, 10*

*
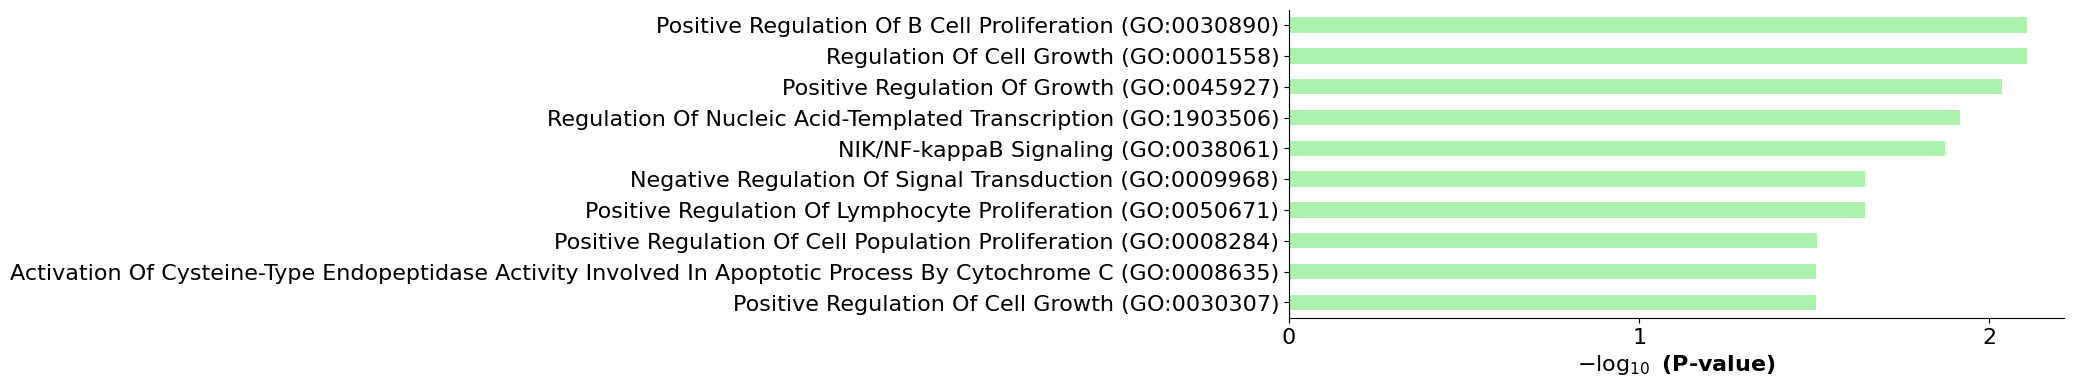
*

# **Supplementary Figure S4: Dynamic Gene Ontology enrichment analysis of the perturbed ΔC6L/ΔK7R/ΔA46R MVA-induced innate immune response Boolean network trajectory.** The y-axis indicates the top 10 enriched biological process GO terms, and the x-axis displays the negative logarithm of the associated p-values (all < 0.05).

**a**

**
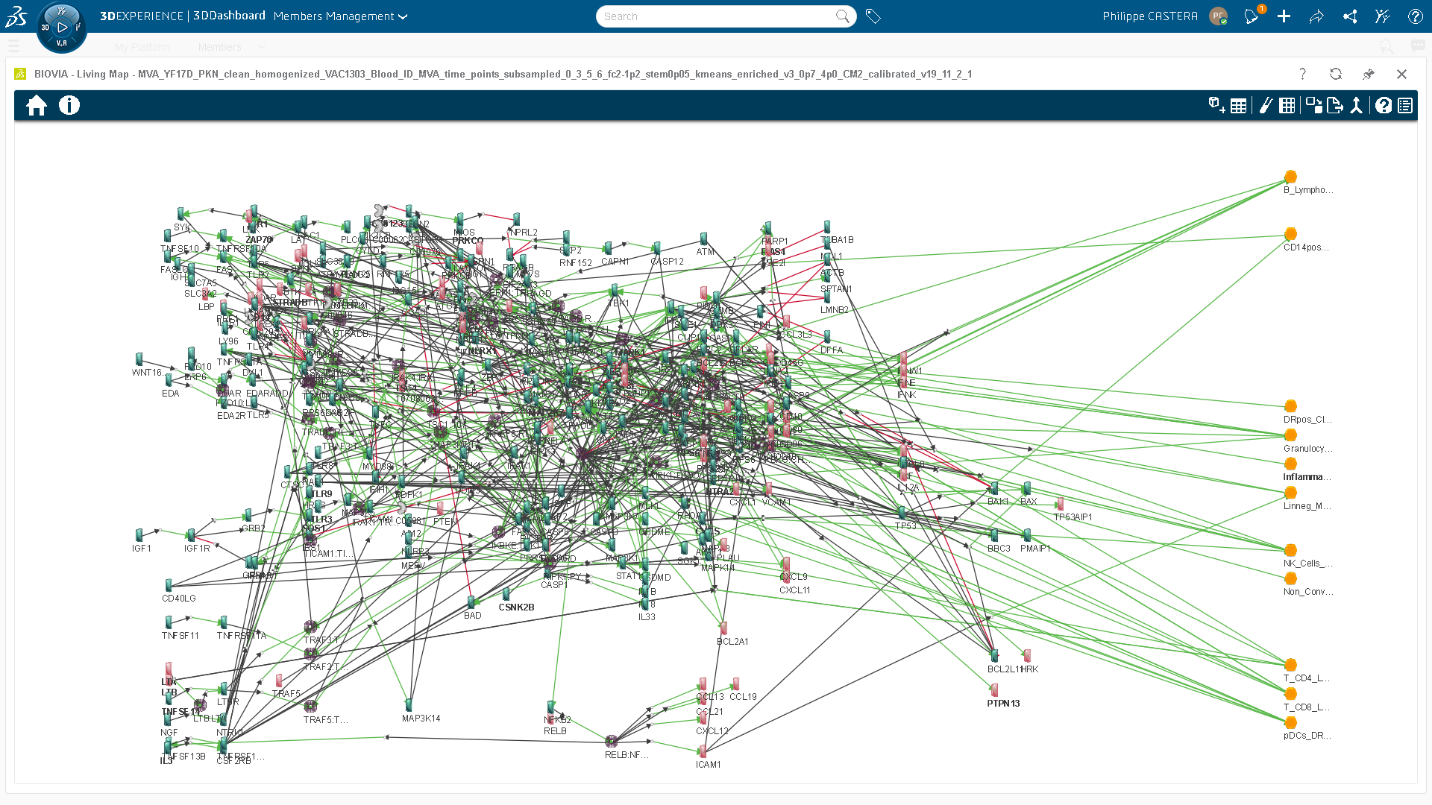
**

**b**

**
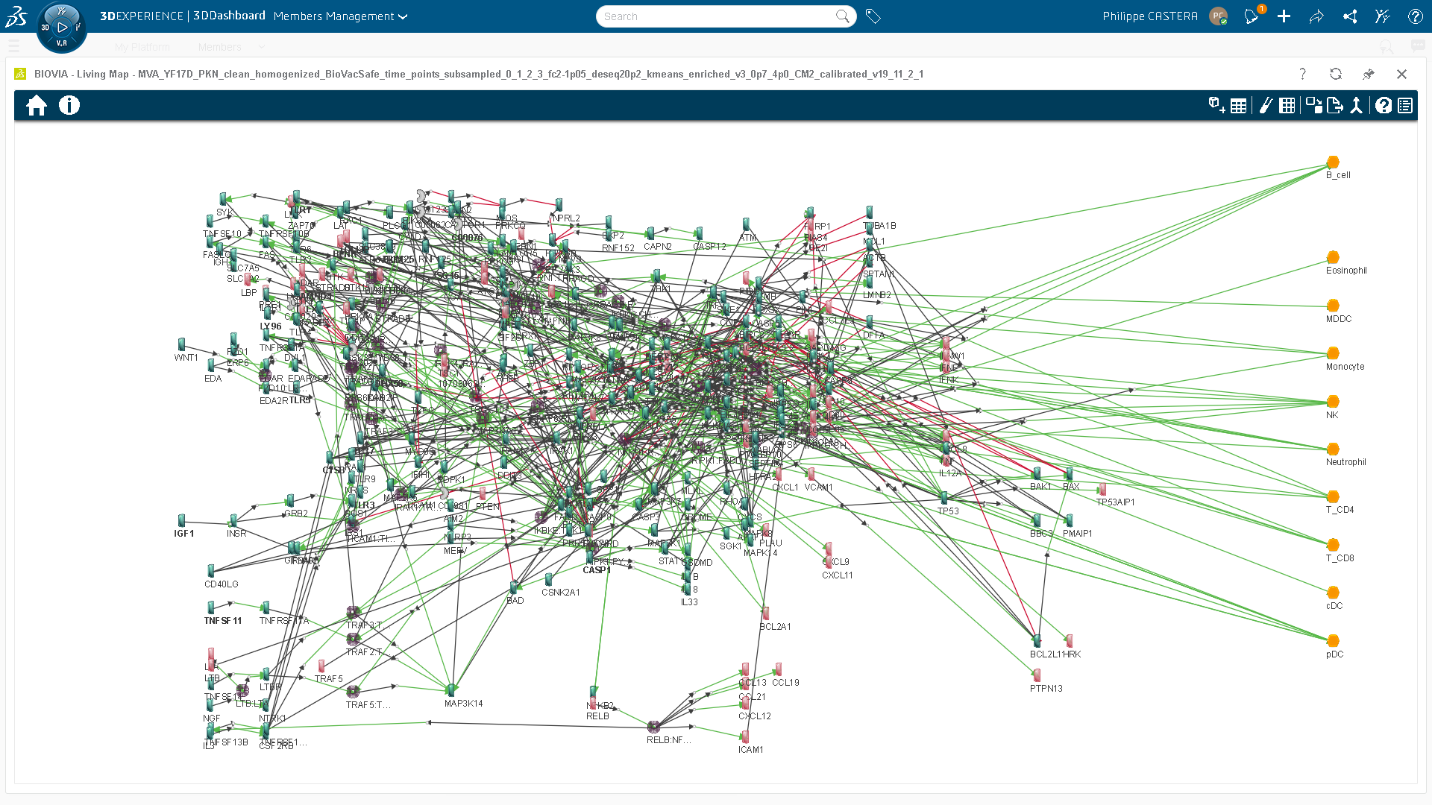
Supplementary** **Figure S5: Calibrated Boolean networks of the MVA- and YF-17D-induced immune responses.** The network backbone is composed of the following six pathways from the KEGG database: cytosolic DNA-sensing, apoptosis, Toll-like receptor signaling, RIG-I-like receptor signaling, NF-κB signaling and mTOR. The shared consensus naïve network was calibrated with experimental preclinical data from 46 and 71, and using ZhegAlCal 74. The calibrated networks are visualized using Dassault Systèmes Living Map software and are also available for simulation, perturbation, and analysis on the CellCollective platform. **(a)** MVA-induced response Boolean network ([MVA 6 pathways](https://research.cellcollective.org#f496e96b-168e-4450-a6a1-2347686f67f6)). **(b)** YF-17D-induced response Boolean network ([YF17D](https://research.cellcollective.org#7a698246-af11-4856-9129-d66f3a41fc0c)).

**a**

*Network update, 1; Experimental time point, 24 hours*

*
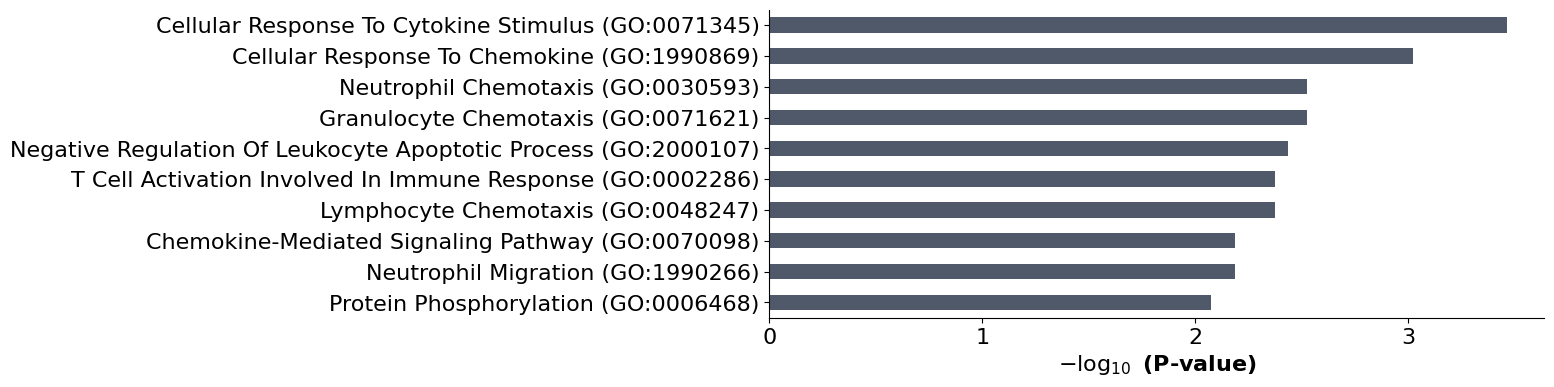
*

*Network update, 2; Experimental time point, 72 hours*

*
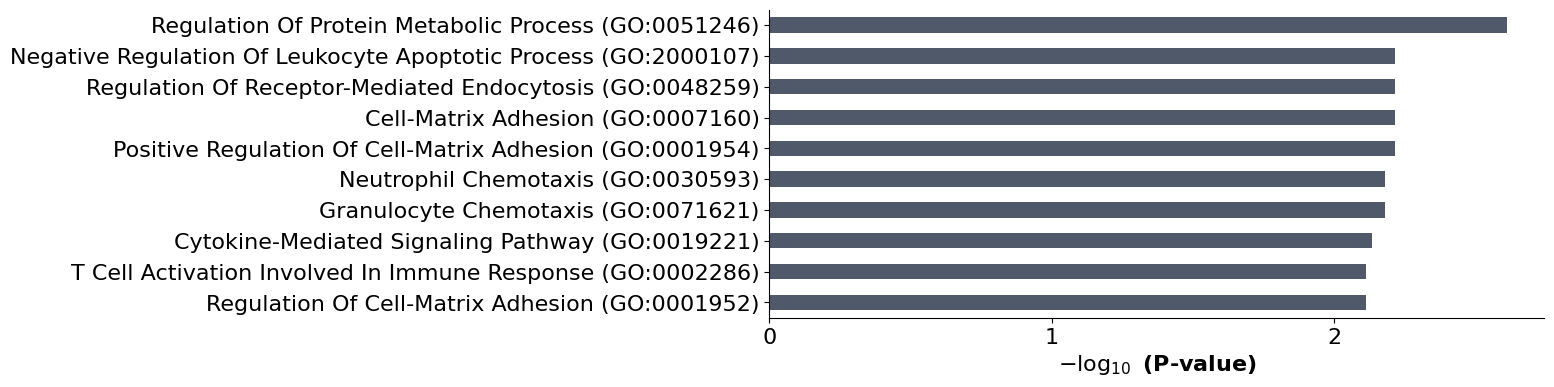
*

*Network update, 3 (intermediary simulation step that match non experimental time point)*

*
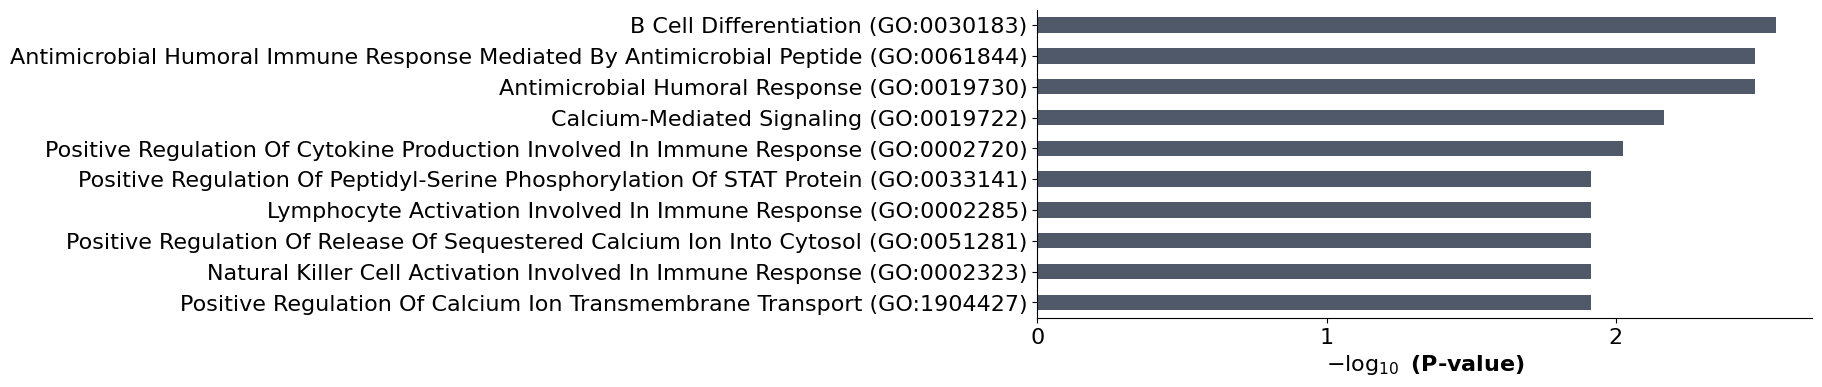
*

*Network update, 4; Experimental time point, 168 hours*

*
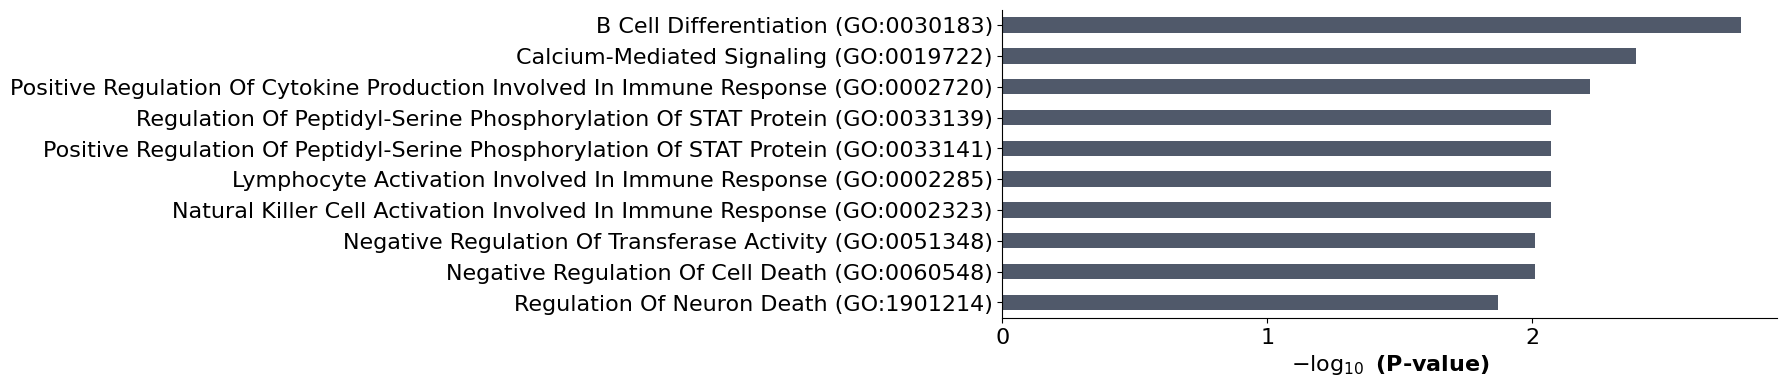
*

**b**

*Network update, 1; Experimental time point, 24 hours*

*
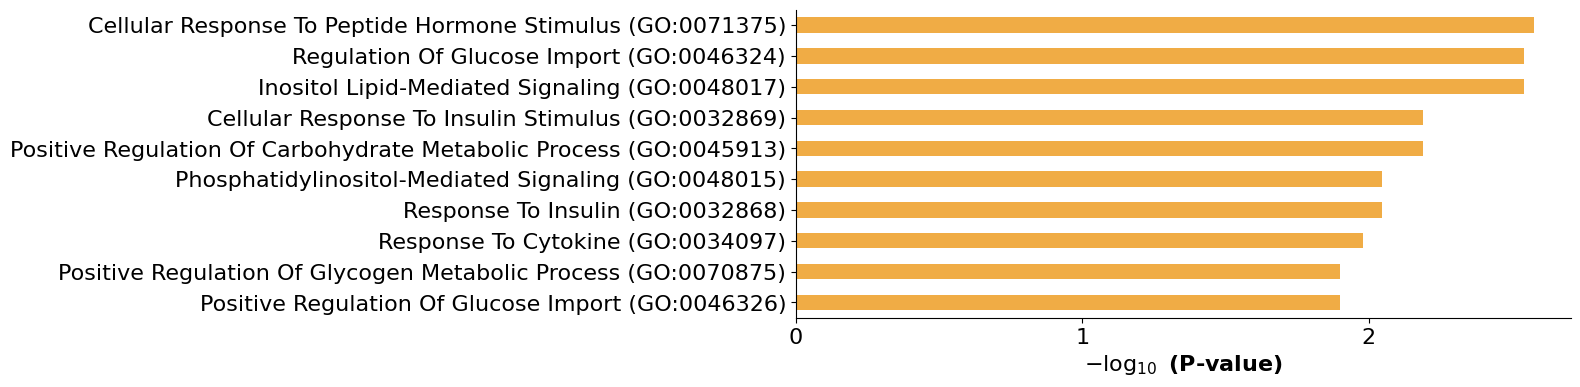
*

*Network update, 2 (intermediary simulation step that match non experimental time point)*

*
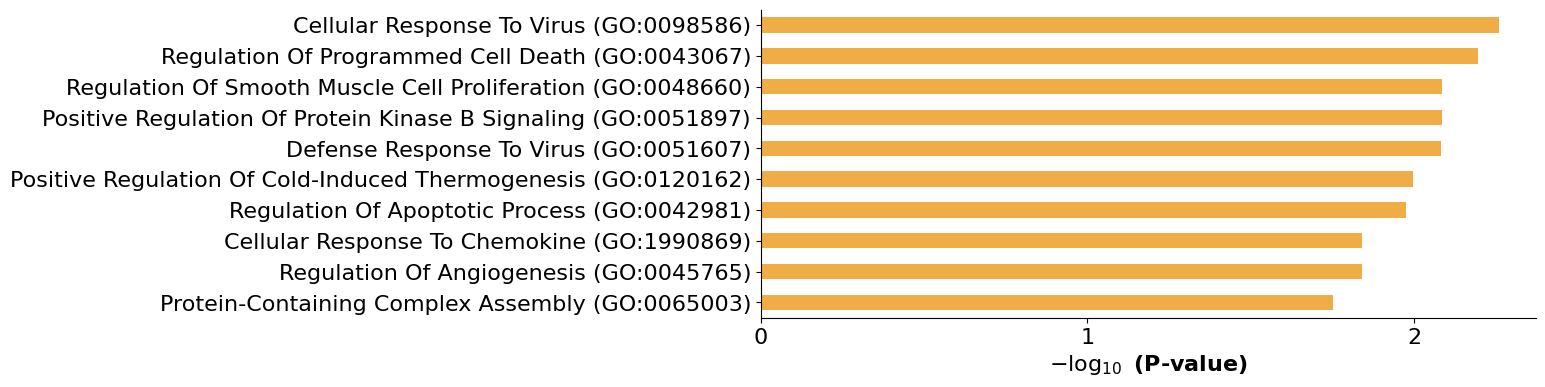
*

*Network update, 3; Experimental time point, 72 hours*

*
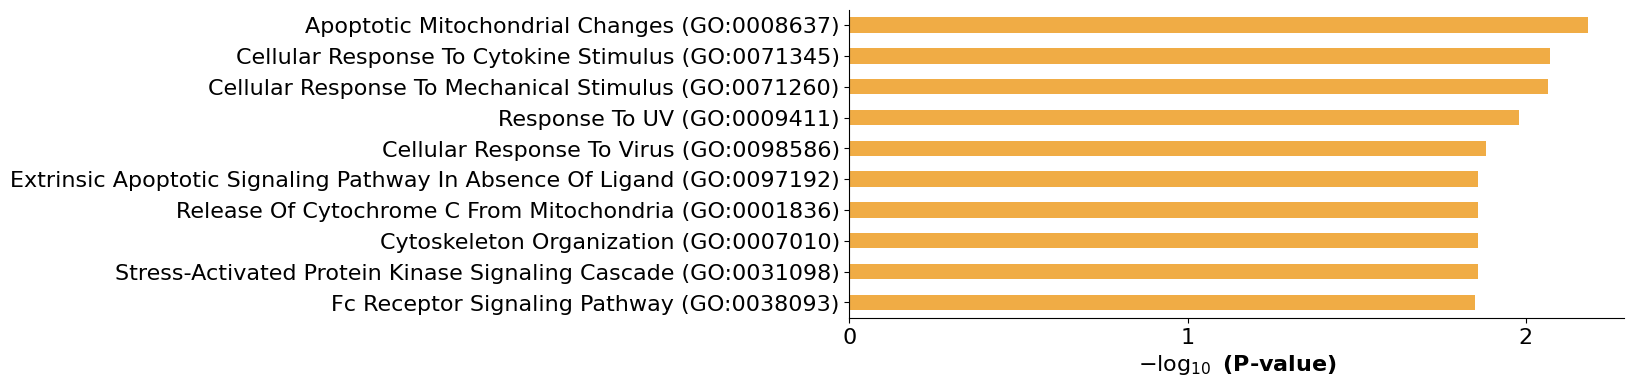
*

*Network update, 4 (intermediary simulation step that match non experimental time point)*

*
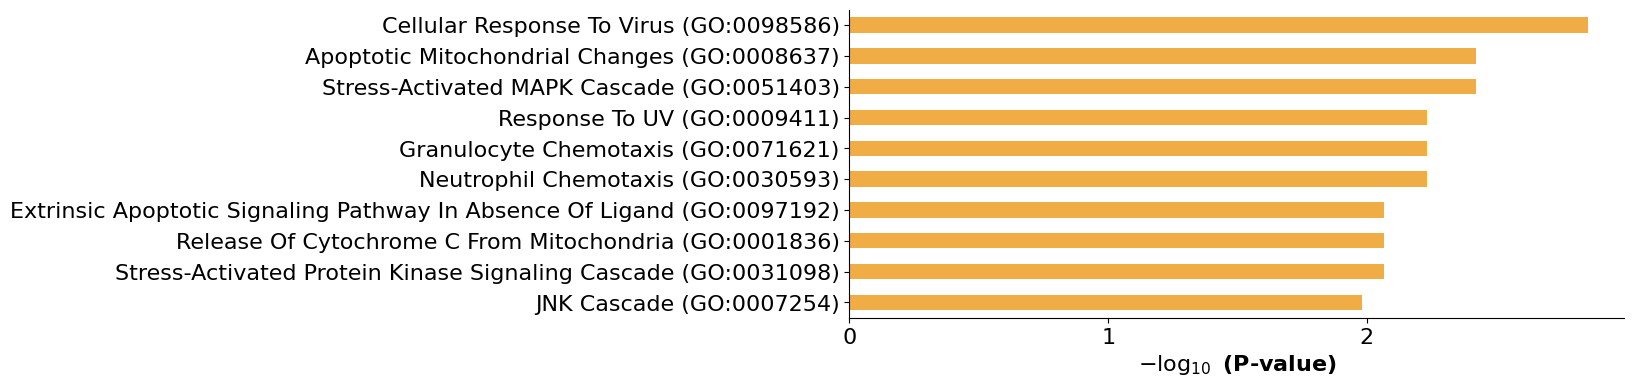
*

*Network update, 5; Experimental time point, 168 hours*

*
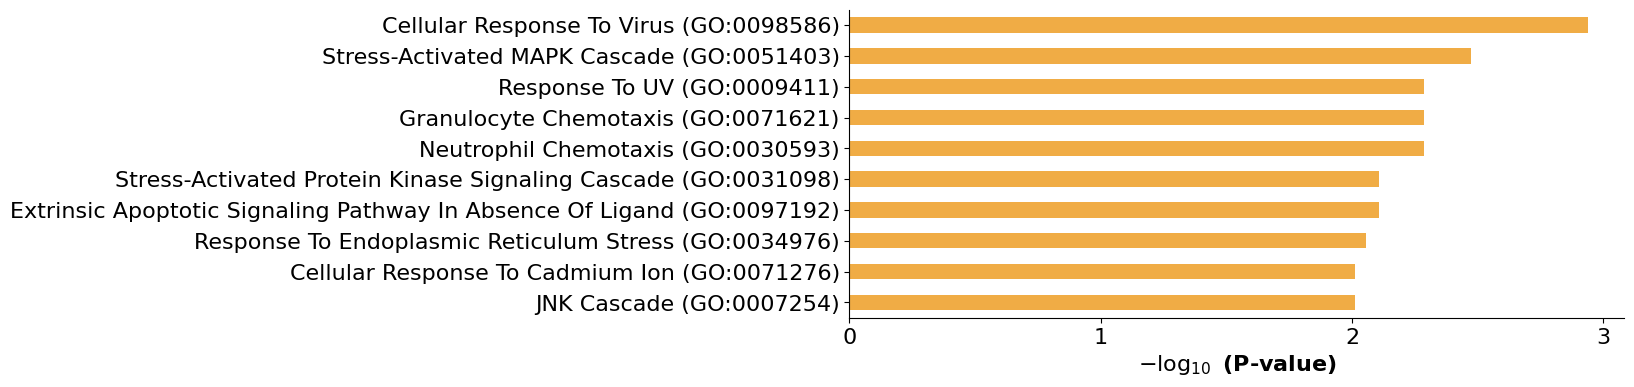
*

# **Supplementary Figure S6: Dynamic Gene Ontology enrichment analysis of the unperturbed MVA- and YF-17D-induced immune response Boolean network trajectories. (a)** MVA-induced response Boolean network. **(b)** YF-17D-induced response Boolean network. The y-axis indicates the top 10 enriched biological process GO terms and the x-axis displays the negative logarithm of the associated p-values (all < 0.05).

#
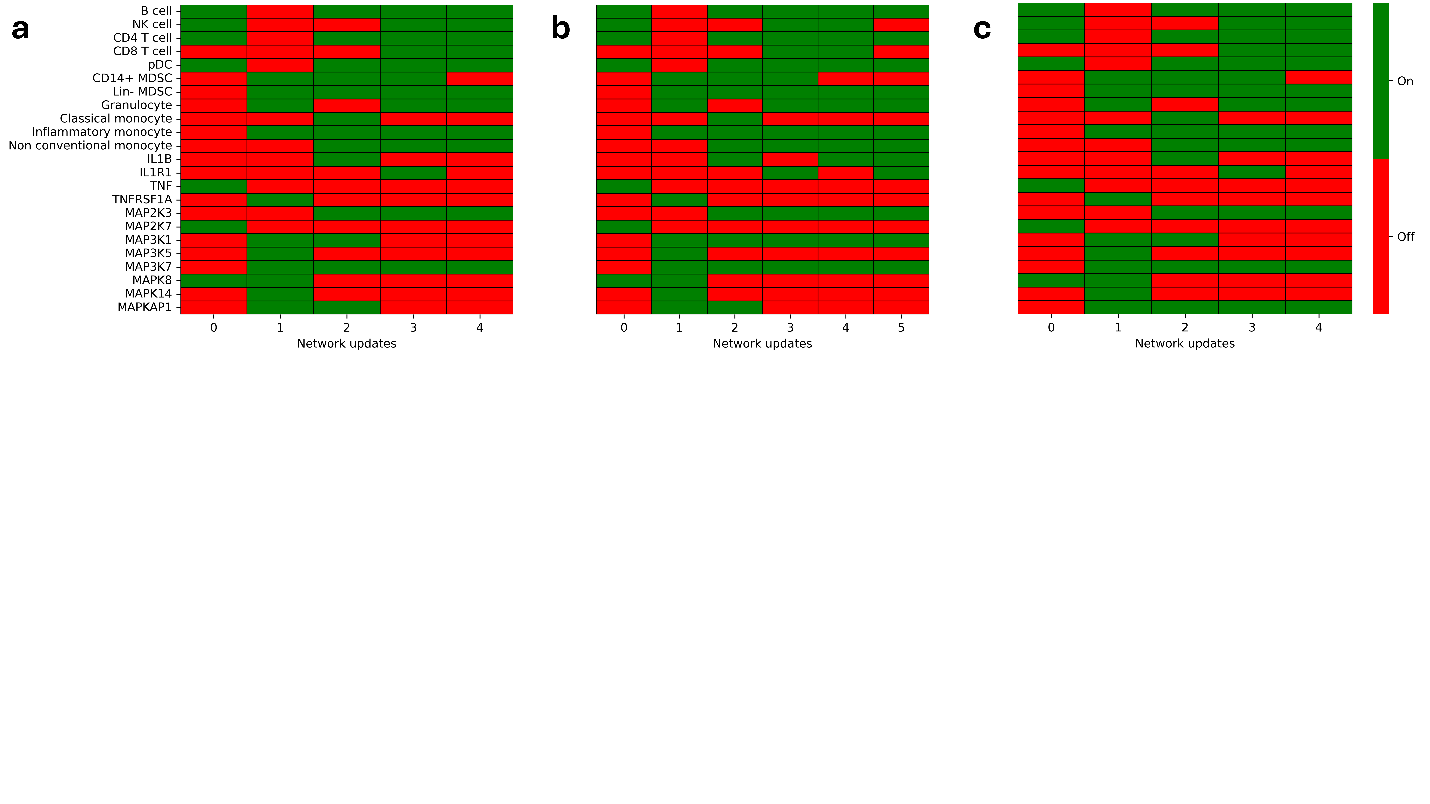
**Supplementary Figure S7: Binary cellular abundances and innate immune marker gene expression in perturbed and unperturbed MVA-induced immune response Boolean network simulations. (a)** Parental MVA, **(b)** MVA ΔK7R MVA, and **(c)** MVA ΔF17R simulations.
